# Supplementary material for: Use of Mineralocorticoid Receptor Antagonists in Patients With Heart Failure and Comorbid Diabetes Mellitus or Chronic Kidney Disease
Source: PubMed Central journal article supplement — J Am Heart Assoc. 2017 Dec 23;6(12):e006540. doi: 10.1161/JAHA.117.006540 (PMC5779000; doi:10.1161/jaha.117.006540), 2017-12-23
Supplement: JAH3-6-e006540-s001.pdf [file JAH3-6-e006540-s001.pdf]

# **SUPPLEMENTAL MATERIAL**

**Table S1.** Baseline Characteristics of the Study Population by Study Group After Application of Inverse Probability Weights.

| Characteristic                             | MRA<br>(n = 2067) | No MRA<br>(n = 14,781) | Standardized<br>Difference, % | <i>P</i><br>Value |
|--------------------------------------------|-------------------|------------------------|-------------------------------|-------------------|
| Age, mean (SD), y                          | 77.9 (7.8)        | 77.6 (7.6)             | 4.0                           | .09               |
| Age group                                  |                   |                        | 0.7                           | .76               |
| 65-79 y                                    | 58.3              | 58.7                   |                               |                   |
| ≥ 80 y                                     | 41.7              | 41.3                   |                               |                   |
| Men                                        | 51.2              | 50.6                   | 1.1                           | .64               |
| Race                                       |                   |                        | 1.7                           | .78               |
| African American                           | 11.1              | 11.4                   |                               |                   |
| White                                      | 75.0              | 74.3                   |                               |                   |
| Other/unknown                              | 13.8              | 14.3                   |                               |                   |
| Disease state                              |                   |                        |                               |                   |
| Diabetes mellitus                          | 82.4              | 82.7                   | 1.0                           | .68               |
| Chronic renal insufficiency                | 33.9              | 35.0                   | 2.4                           | .30               |
| Medical history                            |                   |                        |                               |                   |
| Anemia                                     | 22.7              | 22.1                   | 1.3                           | .57               |
| Atrial fibrillation                        | 37.3              | 35.6                   | 3.5                           | .14               |
| Chronic obstructive pulmonary disease      | 30.6              | 31.8                   | 2.6                           | .28               |
| Depression                                 | 9.5               | 9.7                    | 0.5                           | .82               |
| Heart failure with ischemic etiology       |                   |                        | 2.2                           | .63               |
| No                                         | 43.3              | 44.3                   |                               |                   |
| Yes                                        | 50.0              | 49.5                   |                               |                   |
| Missing                                    | 6.7               | 6.3                    |                               |                   |
| Hyperlipidemia                             | 57.3              | 57.6                   | 0.6                           | .81               |
| Hypertension                               | 82.4              | 83.2                   | 2.1                           | .36               |
| Implantable cardioverter-defibrillator     | 8.8               | 8.9                    | 0.3                           | .90               |
| Pacemaker                                  | 17.7              | 17.8                   | 0.2                           | .92               |
| Peripheral vascular disease                | 16.8              | 16.4                   | 1.3                           | .58               |
| Smoker in the past year                    | 9.5               | 9.7                    | 0.4                           | .87               |
| Vital signs at admission                   |                   |                        |                               |                   |
| Heart rate, mean (SD), bpm                 | 81.5 (18.4)       | 82.1 (18.9)            | 3.1                           | .19               |
| Respiratory rate ≥ 30 breaths/min, No. (%) | 5.9               | 6.0                    | 0.7                           | .77               |
| Systolic blood pressure, mean (SD), mm Hg  | 145.4 (31.0)      | 145.1 (29.6)           | 1.0                           | .67               |
| Tests at admission/discharge               |                   |                        |                               |                   |
| Reduced ejection fraction at admission*    | 39.1              | 39.8                   | 1.6                           | .50               |
| Serum Creatinine, mean (SD), mg/dL         | 1.8 (1.1)         | 1.8 (1.2)              | 1.4                           | .57               |
| Serum Potassium, mean (SD), mEq/L          | 4.1 (0.5)         | 4.1 (0.5)              | 1.3                           | .57               |
| Serum urea nitrogen, mean (SD), mg/dL      | 35.2 (18.8)       | 34.5 (17.9)            | 4.0                           | .08               |
| Discharge year                             |                   |                        | 3.5                           | .97               |
| 2005                                       | 4.0               | 3.4                    |                               |                   |
| 2006                                       | 14.0              | 14.2                   |                               |                   |
| 2007                                       | 13.0              | 12.6                   |                               |                   |
| 2008                                       | 11.0              | 11.0                   |                               |                   |
| 2009                                       | 11.4              | 11.4                   |                               |                   |
| 2010                                       | 12.6              | 12.8                   |                               |                   |
| 2011                                       | 12.8              | 12.8                   |                               |                   |
| 2012                                       | 10.7              | 10.7                   |                               |                   |
| 2013                                       | 10.5              | 11.1                   |                               |                   |

\*Reduced ejection fraction is defined as documentation of a left ventricular ejection fraction of 35% or less, or a qualitative assessment of moderate or severe left ventricular systolic dysfunction.

**Table S2.** Associations Between Baseline Characteristics and 3-Year Outcomes Among Patients With Heart Failure With Preserved Ejection Fraction.

| Characteristic                         | Hospitalization for Hyperkalemia (Any Position) |                | Hospitalization for Acute Renal Insufficiency (Any Position) |                |
|----------------------------------------|-------------------------------------------------|----------------|--------------------------------------------------------------|----------------|
|                                        | Adjusted HR (95% CI)                            | <i>P</i> Value | Adjusted HR (95% CI)                                         | <i>P</i> Value |
| Age, per 5 years                       | 1.05 (0.92-1.19)                                | .46            | 0.98 (0.90-1.07)                                             | .68            |
| Women                                  | 1.84 (1.28-2.64)                                | .001           | 1.28 (1.05-1.56)                                             | .01            |
| Race                                   |                                                 |                |                                                              |                |
| African American                       | 1.43 (0.85-2.40)                                | .18            | 1.00 (0.72-1.39)                                             | .99            |
| White                                  | 1.00 [Reference]                                |                | 1.00 [Reference]                                             |                |
| Other/unknown                          | 0.93 (0.51-1.72)                                | .83            | 0.90 (0.64-1.27)                                             | .55            |
| Medical History                        |                                                 |                |                                                              |                |
| Diabetes mellitus                      | 1.27 (0.61-2.62)                                | .52            | 1.06 (0.75-1.50)                                             | .72            |
| Anemia                                 | 1.10 (0.72-1.69)                                | .67            | 1.02 (0.74-1.38)                                             | .92            |
| Atrial fibrillation                    | 1.28 (0.84-1.95)                                | .26            | 1.28 (1.05-1.57)                                             | .01            |
| Chronic obstructive pulmonary disease  | 1.23 (0.81-1.87)                                | .32            | 1.42 (1.18-1.71)                                             | <.001          |
| Depression                             | 1.09 (0.61-1.94)                                | .77            | 1.16 (0.85-1.59)                                             | .34            |
| Heart failure with ischemic etiology   | 1.43 (0.93-2.19)                                | .10            | 1.03 (0.84-1.27)                                             | .77            |
| Hyperlipidemia                         | 0.91 (0.58-1.42)                                | .68            | 1.06 (0.85-1.34)                                             | .60            |
| Hypertension                           | 0.96 (0.56-1.65)                                | .89            | 0.97 (0.73-1.28)                                             | .81            |
| Implantable cardioverter-defibrillator | 2.47 (1.05-5.81)                                | .04            | 1.33 (0.88-2.03)                                             | .18            |
| Pacemaker                              | 0.71 (0.42-1.21)                                | .21            | 0.83 (0.63-1.09)                                             | .17            |
| Peripheral vascular disease            | 0.93 (0.54-1.58)                                | .78            | 1.21 (0.91-1.62)                                             | .18            |
| Smoker in the past year                | 0.98 (0.49-1.94)                                | .95            | 1.34 (0.98-1.84)                                             | .07            |
| Vital signs                            |                                                 |                |                                                              |                |
| Heart rate                             | 0.97 (0.92-1.02)                                | .25            | 0.96 (0.93-0.99)                                             | .01            |
| Respiratory rate $\geq$ 30 breaths/min | 2.00 (0.90-4.44)                                | .09            | 1.10 (0.62-1.92)                                             | .75            |
| Systolic blood pressure                | 1.04 (0.97-1.10)                                | .29            | 0.99 (0.94-1.03)                                             | .57            |
| Laboratory tests                       |                                                 |                |                                                              |                |
| Serum creatinine                       | 1.37 (1.07-1.76)                                | .01            | 1.22 (1.03-1.46)                                             | .02            |
| Serum potassium                        | 1.53 (1.02-2.30)                                | .04            | 1.13 (0.88-1.46)                                             | .34            |
| Serum urea nitrogen                    | 1.00 (0.99-1.01)                                | .87            | 1.01 (1.01-1.02)                                             | <.001          |

**Table S3.** Associations Between Baseline Characteristics and 3-Year Outcomes Among Patients With Heart Failure With Reduced Ejection Fraction

| Characteristic                         | Hospitalization for Hyperkalemia (Any Position) |                | Hospitalization for Acute Renal Insufficiency (Any Position) |                |
|----------------------------------------|-------------------------------------------------|----------------|--------------------------------------------------------------|----------------|
|                                        | Adjusted HR (95% CI)                            | <i>P</i> Value | Adjusted HR (95% CI)                                         | <i>P</i> Value |
| Age, per 5 years                       | 1.09 (0.96-1.23)                                | .19            | 1.08 (1.00-1.16)                                             | .04            |
| Women                                  | 1.47 (1.10-1.95)                                | .008           | 0.95 (0.76-1.19)                                             | .66            |
| Race                                   |                                                 |                |                                                              |                |
| African American                       | 0.64 (0.39-1.06)                                | .08            | 0.97 (0.71-1.32)                                             | .83            |
| White                                  | 1.00 [Reference]                                |                | 1.00 [Reference]                                             |                |
| Other/unknown                          | 0.72 (0.39-1.32)                                | .28            | 0.78 (0.59-1.03)                                             | .09            |
| Medical History                        |                                                 |                |                                                              |                |
| Diabetes mellitus                      | 0.74 (0.49-1.12)                                | .16            | 0.80 (0.61-1.05)                                             | .11            |
| Anemia                                 | 1.09 (0.72-1.66)                                | .68            | 1.06 (0.85-1.32)                                             | .63            |
| Atrial fibrillation                    | 1.14 (0.83-1.56)                                | .43            | 1.12 (0.92-1.36)                                             | .25            |
| Chronic obstructive pulmonary disease  | 1.18 (0.87-1.60)                                | .30            | 1.20 (1.01-1.44)                                             | .04            |
| Depression                             | 0.93 (0.53-1.65)                                | .81            | 1.33 (1.04-1.70)                                             | .02            |
| Heart failure with ischemic etiology   | 1.42 (1.00-2.01)                                | .05            | 1.18 (1.03-1.36)                                             | .02            |
| Hyperlipidemia                         | 0.94 (0.64-1.39)                                | .77            | 1.00 (0.81-1.25)                                             | .97            |
| Hypertension                           | 1.12 (0.72-1.76)                                | .61            | 1.11 (0.88-1.39)                                             | .39            |
| Implantable cardioverter-defibrillator | 1.47 (0.98-2.19)                                | .06            | 1.42 (1.15-1.75)                                             | .001           |
| Pacemaker                              | 0.72 (0.48-1.08)                                | .11            | 0.90 (0.72-1.13)                                             | .38            |
| Peripheral vascular disease            | 1.29 (0.82-2.04)                                | .27            | 1.16 (0.89-1.50)                                             | .27            |
| Smoker in the past year                | 1.32 (0.78-2.24)                                | .30            | 1.05 (0.77-1.42)                                             | .77            |
| Vital signs                            |                                                 |                |                                                              |                |
| Heart rate                             | 1.01 (0.96-1.06)                                | .72            | 0.97 (0.95-0.99)                                             | .006           |
| Respiratory rate $\geq$ 30 breaths/min | 0.91 (0.43-1.95)                                | .82            | 0.92 (0.57-1.51)                                             | .75            |
| Systolic blood pressure                | 0.97 (0.91-1.03)                                | .31            | 1.00 (0.96-1.04)                                             | .92            |
| Laboratory tests                       |                                                 |                |                                                              |                |
| Serum creatinine                       | 1.19 (0.99-1.44)                                | .06            | 1.12 (0.97-1.30)                                             | .11            |
| Serum potassium                        | 1.33 (0.93-1.90)                                | .12            | 1.03 (0.85-1.25)                                             | .75            |
| Serum urea nitrogen                    | 1.01 (1.00-1.02)                                | .03            | 1.02 (1.01-1.02)                                             | <.001          |
